# Supplementary material
Source: Research Square preprint supplement (doi:10.21203/rs.3.rs-9520250/v1)
Supplement: Supplementary file 1 [file Response for Reviwers.pdf › non-herm/Response for Reviwers.pdf]

## Response to Reviewers

Dear Editors,

We are resubmitting our manuscript, title: “*Linking DC transport properties and entanglement negativity in non-Hermitian superlattices* “. We reviewed the manuscript following all points raised by the reviewers.

Dear Dr Lima,

Your manuscript, "Linking DC transport properties and entanglement negativity in non-Hermitian superlattices", has now been assessed.

1. We strongly encourage all authors to share their raw data, either by providing it in a supplementary file or depositing it in a public repository and providing the details on how to access it in this section. If you do not wish to share your data, please clearly state this in this section along with a justification. “Data availability” statements can take one of the following forms (or a combination of more than one if required for multiple datasets):

- The datasets generated and/or analysed during the current study are available in the [NAME] repository, [PERSISTENT WEB LINK TO DATASETS]
- The datasets used and/or analysed during the current study available from the corresponding author on reasonable request.
- All data generated or analysed during this study are included in this published article [and its supplementary information files].
- The datasets generated and/or analysed during the current study are not publicly available due [REASON WHY DATA ARE NOT PUBLIC] but are available from the corresponding author on reasonable request.
- The data that support the findings of this study are available from [third party name] but restrictions apply to the availability of these data, which were used under license for the current study, and so are not publicly available. Data are however available from the authors upon reasonable request and with permission of [third party name].

Please note that if you do wish to share your raw data and do not have consent from all patients to publish this data, it will need to be de-identified.

Kindly make sure to provide same data availability statement in the manuscript and in submission system.

We recommend submitting all revisions within the mentioned deadline.

If you need more time, please contact us and include your submission ID.

Kind regards,

Pooja Ravi

Assistant Editor

Scientific Reports

Ans. We thank the reviewer for this important point. The data availability statement has been included at the end of the manuscript, as requested.

Data availability:

All data generated or analysed during this study are included in this published article.
